# Supplementary material
Source: publisher figshare collection journal article supplement (https://asha.figshare.com/articles/dataset/_/20520783)

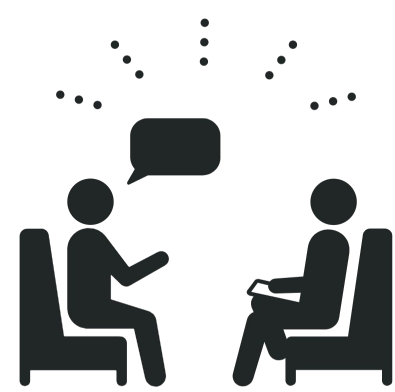

# Aphasia Group Survey

Supplemental Material S3, Levy et al., "Designing and Implementing a Community Aphasia Group: An Illustrative Case Study of the Aphasia Group of Middle Tennessee," *Perspectives*, [https://doi.org/10.1044/2022\\_PERSP-22-00006](https://doi.org/10.1044/2022_PERSP-22-00006)

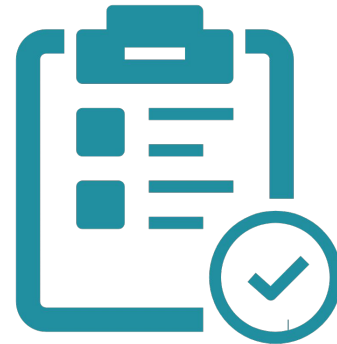

Is it **OK** if we **record** this Zoom call?

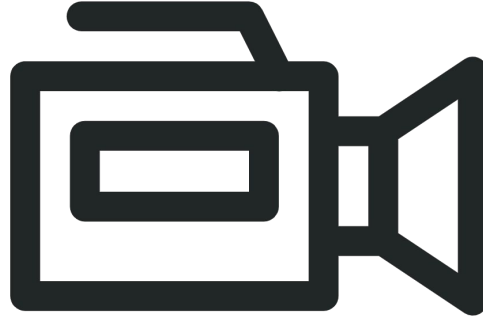

(This is in case any forms or notes get lost!)

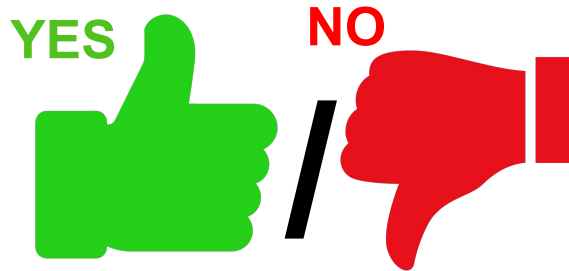

# Informed Consent

**We mailed you two documents that look like these:**

**Institutional Review Board  
Informed Consent Document for Research**

Principal Investigator: Anna Kasdan  
Study Title: Benefits of a community group for individuals with aphasia  
Institution/Hospital: Vanderbilt University Medical Center

Revision Date: 9/15/20

This informed consent document applies to adults with aphasia.

Name of participant: \_\_\_\_\_ Age: \_\_\_\_\_  
PID: \_\_\_\_\_

The following information is provided to inform you about the research project and your participation in it.

Please read this form carefully and feel free to ask any questions you may have about this study and the information given below.

## **Aid to Informed Consent**

### **What is the study called?**

The study is called "Benefits of a community group for individuals with aphasia."

### **What is this booklet?**

This booklet is meant to help you understand our research study.

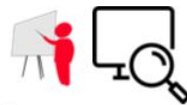

Please feel free to ask us questions!

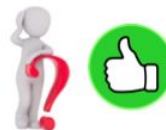

**Please get them out!**

**PID:**

**Age:**

**Group member since:**

I am completing this survey:

- ☐ Alone
- ☐ With a student / SLP
- ☐ With a loved one

# Aphasia Group makes me feel...

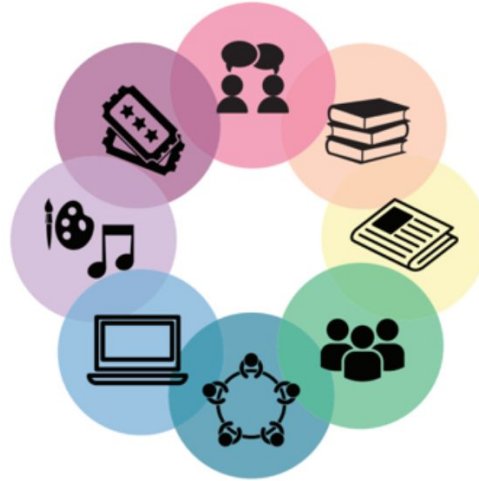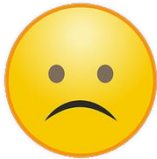

**Very Bad**

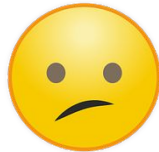

**Bad**

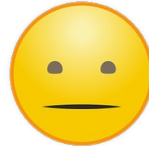

**Okay**

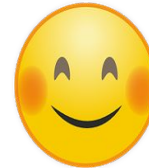

**Good**

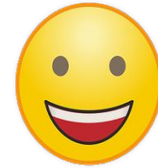

**Very Good**

# My aphasia started...

|  |                                                                                                                      |
|--|----------------------------------------------------------------------------------------------------------------------|
|  | After a <b>stroke</b> / aneurysm  |
|  | After a head <b>injury</b>        |
|  | As I got <b>older</b>             |
|  | Because of a <b>tumor</b>         |

# My ride to Aphasia Group takes...

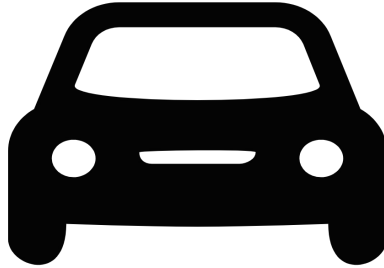

|  |                        |                                                                                                                                                                           |
|--|------------------------|---------------------------------------------------------------------------------------------------------------------------------------------------------------------------|
|  | Less than half an hour |  —                                                                                     |
|  | About an hour          |  —  |
|  | More than an hour      |  +                                                                                     |

| YES<br> | NO<br> | MAYBE<br> |                                                  |
|------------------------------------------------------------------------------------------|-----------------------------------------------------------------------------------------|--------------------------------------------------------------------------------------------|--------------------------------------------------|
|                                                                                          |                                                                                         |                                                                                            | I have come a long way since my aphasia started. |
|                                                                                          |                                                                                         |                                                                                            | I feel connected to people in Aphasia Group.     |
|                                                                                          |                                                                                         |                                                                                            | Aphasia Group helps me feel like myself.         |



# BEFORE joining Aphasia Group, I felt...

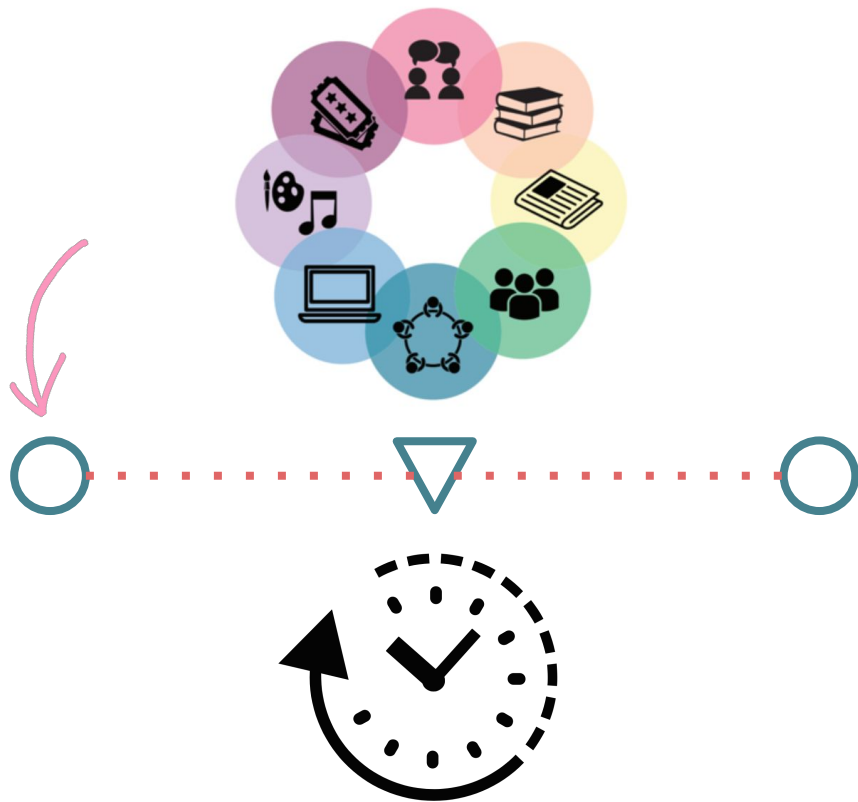

|  |                                                                                               |
|--|-----------------------------------------------------------------------------------------------|
|  | Lonely     |
|  | Sad        |
|  | Isolated   |
|  | Hopeful    |
|  | Supported  |
|  | Able      |

# AFTER joining Aphasia Group, I feel...

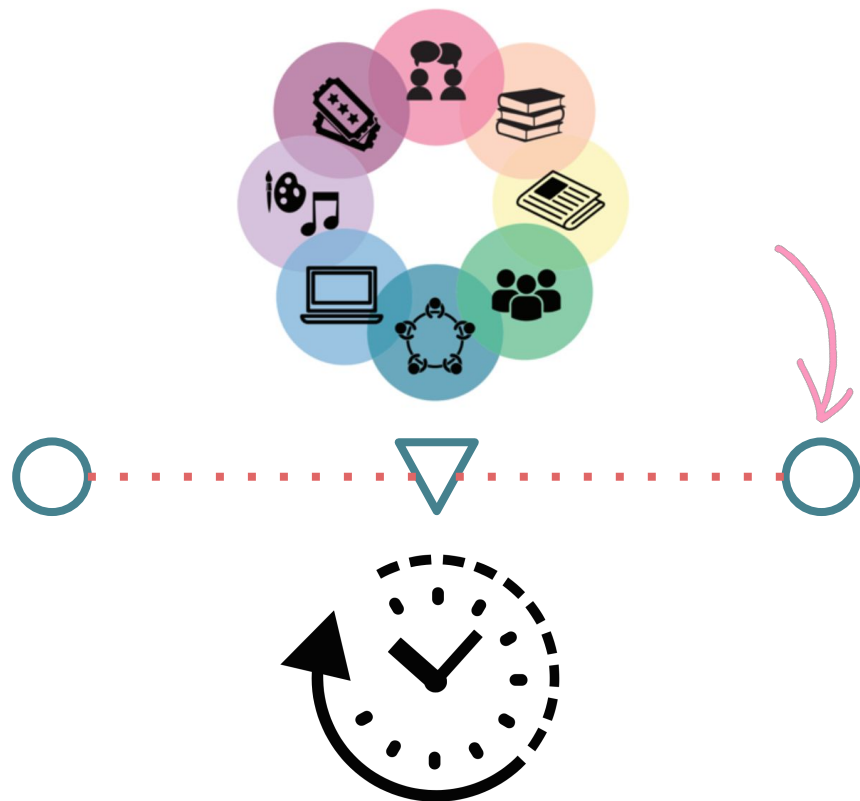

|  |                                                                                               |
|--|-----------------------------------------------------------------------------------------------|
|  | Lonely     |
|  | Sad 🙄                                                                                         |
|  | Isolated   |
|  | Hopeful    |
|  | Supported  |
|  | Able      |

# What is **best** about **Aphasia Group** is...

|  |                                                                                                                                                                                                         |
|--|---------------------------------------------------------------------------------------------------------------------------------------------------------------------------------------------------------|
|  | Meeting / <b>talking</b> to others with aphasia                                                                      |
|  | <b>Teaching</b> students about aphasia                                                                               |
|  | Using <b>technology</b> (iPads, laptops)                                                                             |
|  | <b>Learning</b> new communication strategies                                                                         |
|  | Improving my <b>language</b>                                                                                         |
|  | <b>Getting out</b> of the house   |
|  | Being <b>part</b> of the <b>community</b>                                                                           |

# My favorite activities in Aphasia Group are...

|  |                                                                                                               |
|--|---------------------------------------------------------------------------------------------------------------|
|  | Coffee talk                  |
|  | Partners in Communication  |
|  | Podcast Group                |
|  | Trivia                       |
|  | Current Events              |
|  | Book Club                    |
|  | Big Group                    |
|  | Vinyl Club                  |

# Aphasia Group has helped...

|  |                                                                                                          |
|--|----------------------------------------------------------------------------------------------------------|
|  | My talking             |
|  | My reading            |
|  | My writing            |
|  | My understanding      |
|  | My use of technology  |

**Anything else you'd like to say about  
Aphasia Group?**

A large, empty rectangular box with a thin black border, intended for a user to provide additional comments or information regarding the Aphasia Group.

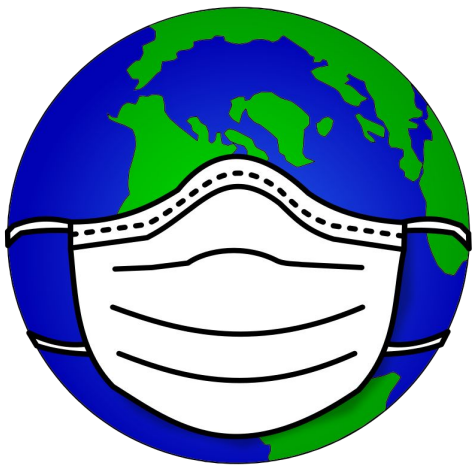

**APHASIA GROUP**  
during  
**COVID / CORONAVIRUS**

| YES<br> | NO<br> | MAYBE<br> |                                                          |
|------------------------------------------------------------------------------------------|-----------------------------------------------------------------------------------------|--------------------------------------------------------------------------------------------|----------------------------------------------------------|
|                                                                                          |                                                                                         |                                                                                            | Aphasia Group has helped me stay connected during COVID. |
|                                                                                          |                                                                                         |                                                                                            | I enjoy Zoom Aphasia Group.                              |
|                                                                                          |                                                                                         |                                                                                            | Zoom Aphasia Group has helped my communication.          |



**Anything else** you'd like to say about  
Aphasia **Group** during **Covid**?

A large, empty rectangular box with a thin black border, intended for a user to provide additional comments or feedback.

**Thank you**  
for participating!

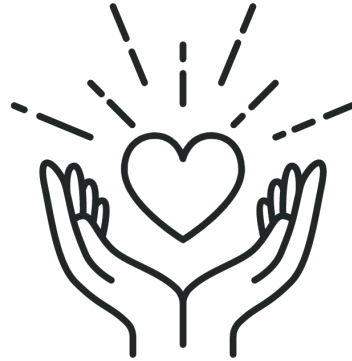

Supplement: Supplementary file 3 [file 1]
