# Supplementary material
Source: publisher figshare collection journal article supplement (https://asha.figshare.com/articles/dataset/_/20520783)
Supplement: Supplementary file 1 [file 1]

## Aid to Informed Consent

### What is the study called?

The study is called "Benefits of a community group for individuals with aphasia."

### What is this booklet?

This booklet is meant to help you understand our research study.

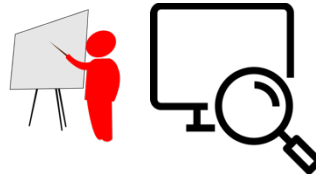

Please feel free to ask us questions!

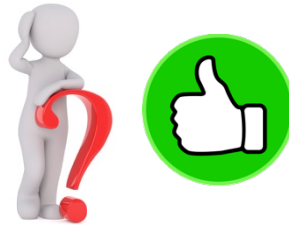

We will give you a copy of this booklet.

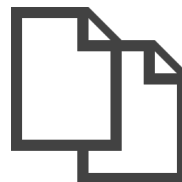

### What is the study for?

We want to learn about Aphasia Group and how it helps people.

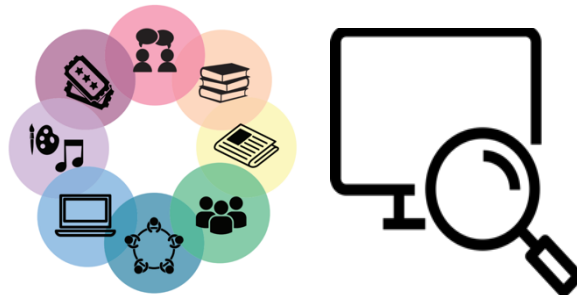

We are asking you to be in our study because you are a member of Aphasia Group.

We will ask you to complete some surveys about group. We may also collect some surveys you would complete during group anyway.

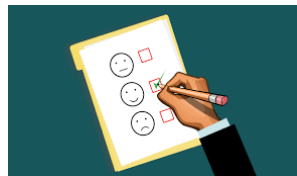

We will ask to film you during some group sessions.

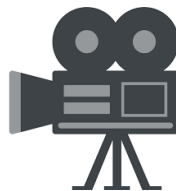

Some risks of being in the study are:

-You could feel bored or stressed from taking the surveys

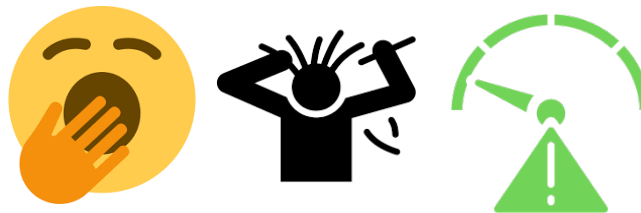

-Someone besides us could see the information we collect

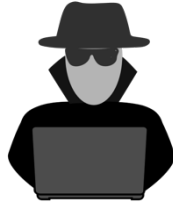

We will do our best to prevent these risks.

**You do not have to be in this study.**

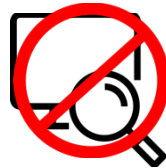

**You can stop being in the study at any time.**

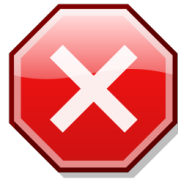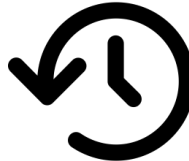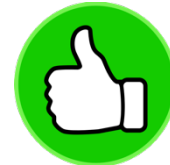

**If anything happens that might make you change your mind about being in the study, we will tell you. Then you can decide whether to stay in the study.**

## **What will I have to do?**

We will ask you about yourself, your language, and your health. We might also gather information about your language and the things you do in group.

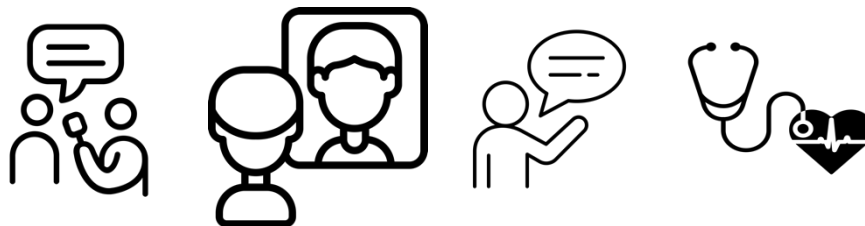

We will ask you to take some surveys about Aphasia Group. You'll take some of the surveys more than once.

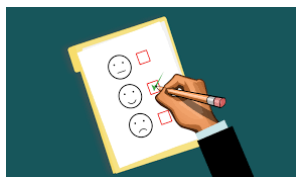

The surveys should not take longer than 30 minutes. You won't have to take any more than 20 surveys a year.

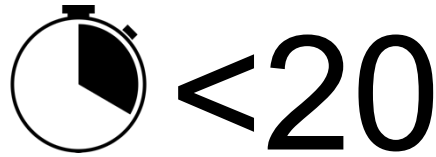

These surveys may happen over Zoom.

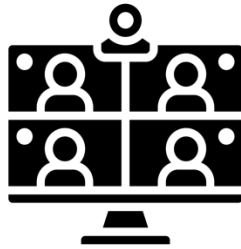

We might also ask to take videos of you during group.

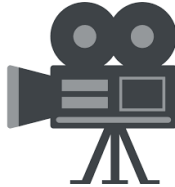

Each video recording would last about an hour. We won't take more than 20 recordings a year.

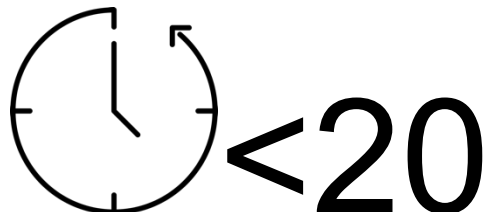

The entire study will last three years. You can leave the study at any time.

## **Does it cost anything?**

It does not cost anything for you to be in this study.

## **Are there any risks?**

You might find the surveys to be stressful, upsetting, or boring.

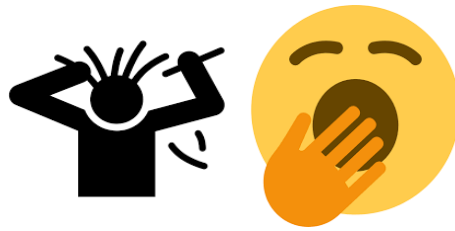

There is also the chance that someone besides the researchers could see your information.

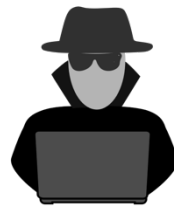

We will try our best to prevent these risks.

Otherwise, there are no risks to being in the study besides those of everyday life.

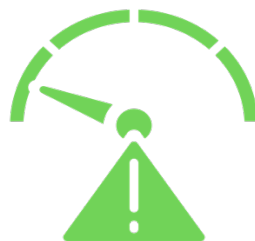

## What happens if I get hurt?

If you get hurt because of the study, you and/or your insurance will not have to pay for care for the injury at Vanderbilt.

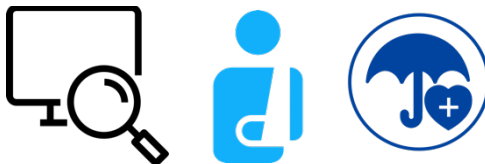

If you get hurt because of your normal treatment, that does not have to do with the research, Vanderbilt will not give you money for the injury.

## What good might come of this study?

This study might help us better understand aphasia groups and how they work. We hope it will help clinicians learn about aphasia and how to run their own groups.

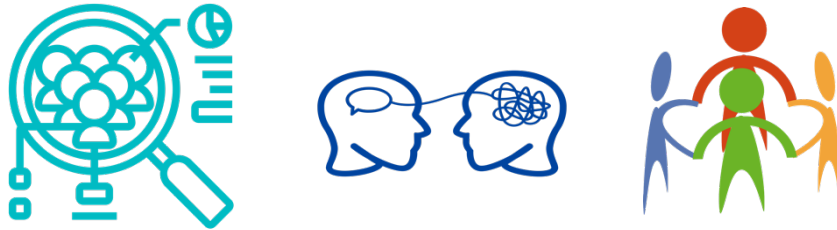

We don't know if the study will help you specifically, but the study might make Aphasia Group even better and help it grow.

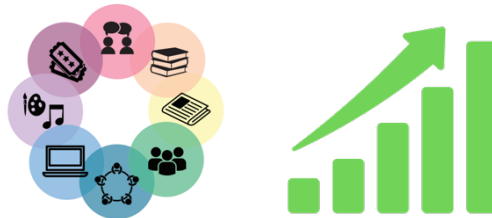

## Will I see the results of this study?

We will share the results of this study with you!

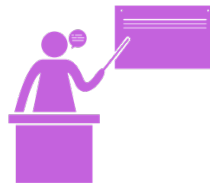

## Is this a treatment study?

This is not a treatment study.

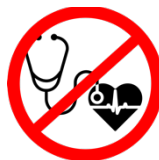

## Will I get paid?

You will not get paid for being in the study.

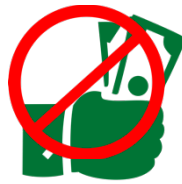

## Could I be taken out of the study?

We might take you out of the study if it seems like the study is making you upset. We might also take you out of the study if it gets harder for you to understand or think clearly.

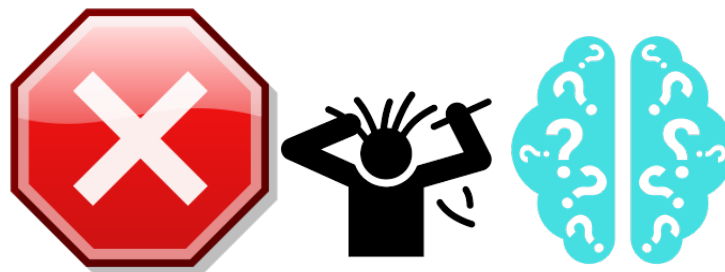

If we take you out of the study, we will let you know why.

## What if I want to stop being in the study?

You can stop being in the study at any time.

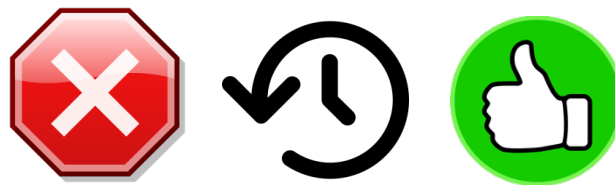

Your experience in Aphasia Group will not change if you choose to stop being in the study.

## Who can I contact with questions?

If you have any questions about the study, you can...

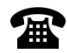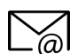

**Call:** [PRINCIPAL INVESTIGATOR NAME]

**Email:** [PRINCIPAL INVESTIGATOR EMAIL]

If you have any concerns about the study, you can...

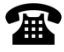

**Call:** [IRB OFFICE NUMBER]

**Call toll-free:** [TOLL-FREE IRB OFFICE NUMBER]

## **Will anyone besides the researchers see my information?**

We will try our best to keep your information private.

Your surveys, videos, and any other information about you will be stored on a password-protected server. Only people involved in the research study can see that information.

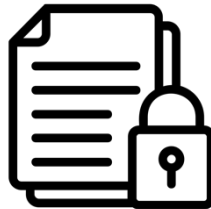

Some of the information we collect can't be matched with you. We might share this information with other researchers. No one who sees this information will know it came from you.

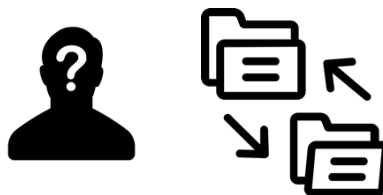

Videos of you can be matched with you, because your face and your voice are in them. You can choose how we use those videos.

Is it okay for us to...

\_\_\_\_\_ Share videos of you in presentations or teaching materials?

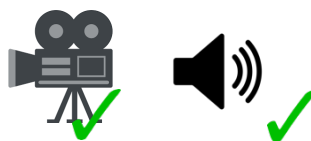



If not, you can choose this option:

\_\_\_\_\_ No one besides the researchers can see or hear the videos.

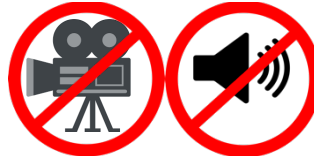

## How will my privacy be protected?

When you agree to be in the study, you are agreeing to let us share your information with...

- The Vanderbilt University Institutional Review Board (IRB)
- The Federal Government Office for Human Research Protections

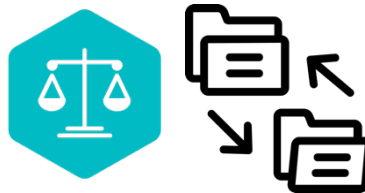

We might have to share your information if you or someone else is in danger, or if it's required by law.

Your consent to use your data does not expire.

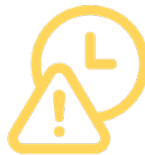

If you change your mind about being in the study, please contact Anna Kasdan.

You can reach her by mail at...

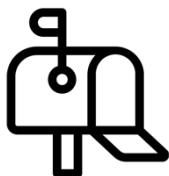

[PI ADDRESS]

...by telephone at...

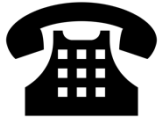

[PI PHONE]

or by email at...

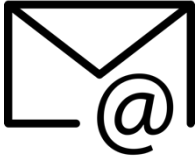

[PI EMAIL]

We will stop gathering information about you after you've asked to leave the study. However, anything we collected before you asked us to stop might still be used.

## **STATEMENT BY PERSON AGREEING TO PARTICIPATE IN THIS STUDY**

I have **read** and **understood** the consent booklet.

I have had time to **think** and **ask questions**.

All of my **questions** were **answered**.

I am **choosing** to **be in** this **study**.

\_\_\_\_\_  
Date

\_\_\_\_\_  
Signature of volunteer

Consent obtained by:

\_\_\_\_\_  
Date

\_\_\_\_\_  
Signature

\_\_\_\_\_  
Printed Name and Title
